# Supplementary material
Source: publisher site journal article supplement (https://www.dovepress.com/article/328583)
Supplement: Supplementary file 1 [file get_supplementary_file.php]

SUPPLEMENTARY MATERIALS

**Table S1** PubMed search strategy and results

Interface / URL: https://pubmed.ncbi.nlm.nih.gov/

Database coverage dates: Information not found

Search date: 03/09/20

Retrieved records: 5189

Search strategy:

1 "diabetes mellitus"[mesh:noexp] OR "diabetes mellitus, type 2"[mesh:noexp] 247,366

2 (diabet*[tiab] OR dm[tiab]) 666,218

3 (dm2[tiab] OR t2dm[tiab] OR t2d[tiab] OR t2-d[tiab]) 33,781

4 (niddm[tiab] OR nid-dm[tiab] OR iidm[tiab] OR ii-dm[tiab]) 7,297

5 #1 OR #2 OR #3 OR #4 698,760

6 "body weight"[mesh:noexp] OR "body weight changes"[mesh:noexp] OR "body-weight trajectory"[mesh:noexp] 189,466

7 "weight gain"[mesh] OR "weight loss"[mesh:noexp] 66,545

8 weigh*[tiab] 1,061,985

9 "body mass index"[mesh:noexp] 127,458

10 (bmi[tiab] OR bmis[tiab] OR body mass[tiab]) 279,613

11 #6 OR #7 OR #8 OR #9 OR #10 1,368,701

12 "treatment adherence and compliance"[mesh:noexp] OR "patient compliance"[mesh:noexp] OR "medication adherence"[mesh:noexp] 77,101

13 (adher*[tiab] OR nonadher*[tiab]) 198,637

14 (persist*[tiab] OR nonpersist*[tiab]) 477,393

15 (complian*[tiab] OR noncomplian*[tiab] OR comply[tiab] OR noncomply[tiab] OR complies[tiab] OR noncomplies[tiab] OR complied[tiab] OR noncomplied[tiab] OR complier*[tiab] OR noncomplier*[tiab] OR complying[tiab] OR noncomplying[tiab]) 152,225

16 discontinu*[tiab] 127,904

17 #12 OR #13 OR #14 OR #15 OR #16 950,511

18 #5 AND #11 AND #17 7,246

19 medication possession ratio*[tiab] 1,284

20 (mpr[tiab] OR mprs[tiab]) 3,464

21 dichotomous variable*[tiab] 1,538

22 (interval measure[tiab] AND medication*[tiab]) 12

23 medication acquisition*[tiab] 64

24 medication gap*[tiab] 67

25 (cma[tiab] OR cmg[tiab] OR csa[tiab] OR csg[tiab]) 28,324

26 pill count*[tiab] OR pillcount*[tiab] 1,019

27 brief medication questionnaire*[tiab] 37

28 bmq[tiab] 258

29 hill-bone*[tiab] 45

30 hbcs*[tiab] 320

31 morisky*[tiab] 1,186

32 mmas*[tiab] 887

33 maq[tiab] 185

34 self-efficacy[tiab] AND appropriate medication[tiab] 24

35 seams*[tiab] 830

36 mars*[tiab] 28,879

37 mcq[tiab] 830

38 mat[tiab] 9,688

39 proportion of days covered[tiab] 895

40 pds[tiab] 6,757

41 mra[tiab] 8,380

42 rcr[tiab] 1,471

43 dbr[tiab] 534

44 #19 OR #20 OR #21 OR #22 OR #23 OR #24 OR #25 OR #26 OR #27 OR #28 OR #29 OR #30 OR #31 OR #32 OR #33 OR #34 OR #35 OR #36 OR #37 OR #38 OR #39 OR #40 OR #41 OR #42 OR #43 95,149

45 #5 AND #11 AND #44 401

46 diabetes self management profile*[tiab] 29

47 dsmp*[tiab] 69

48 diabetes self-management questionnaire*[tiab] 24

49 dsmq*[tiab] 20

50 summary of diabetes self-care activities*[tiab] 194

51 sdsca*[tiab] 152

52 #46 OR #47 OR #48 OR #49 OR #50 OR #51 361

53 #11 AND #52 46

54 #18 OR #45 OR #53 7,596

55 "Animals"[mesh] NOT "Humans"[mesh:noexp] 4,731,378

56 ("news"[pt:noexp] OR "editorial"[pt:noexp] OR "case reports"[pt:noexp] OR "comment"[pt:noexp] OR "letter"[pt:noexp]) OR "case report"[ti] 4,010,412

57 #54 NOT (#55 OR #56) 6,741

58 #54 NOT (#55 OR #56) English 6,385

59 2005/01/01:2020/12/31[dp] 15,114,297

60 #58 AND #59 5,189

**Table S2** EMBASE search strategy and results

Interface / URL: embase.com

Database coverage dates: Journal coverage from 1947 to the present; conferences dating from 2009

Search date: 03/09/20

Retrieved records: 8516

Search strategy:

#72. #61 OR #71 8,516

#71. #59 AND #60 AND #69 AND [2019-2020]/py 66

#70. #59 AND #60 AND #69 1,530

#69. #62 OR #63 OR #64 OR #65 OR #66 OR #67 OR #68 84,831

#68. ispor:nc 42,991

#67. 'international society for pharmacoeconomics and 4,990

outcomes research':nc

#66. easd:nc 13,086

#65. 'european association for the study diabetes':nc 1,216

#64. 'european association for the study of 12,041

diabetes':nc

#63. ada:nc 9,681

#62. 'american diabetes association':nc 28,325

#61. #59 NOT #60 8,450

#60. 'conference abstract':it 3,831,002

#59. #54 NOT (#55 OR #56) AND [english]/lim AND 15,615

[2005-2020]/py

#58. #54 NOT (#55 OR #56) AND [english]/lim 17,069

#57. #54 NOT (#55 OR #56) 17,674

#56. letter:it OR editorial:it OR 'case report':ti 2,079,796

#55. ('animal'/de OR 'animal experiment'/de OR 'animal 6,480,599

model'/de OR 'animal tissue'/de OR 'nonhuman'/de)

NOT 'human'/exp

#54. #18 OR #45 OR #53 18,858

#53. #11 AND #52 107

#52. #46 OR #47 OR #48 OR #49 OR #50 OR #51 589

#51. sdsca*:ti,ab,kw,ok 267

#50. 'summary of diabetes self-care 304

activities*':ti,ab,kw,ok

#49. dsmq*:ti,ab,kw,ok 37

#48. 'diabetes self-management 45

questionnaire*':ti,ab,kw,ok

#47. dsmp*:ti,ab,kw,ok 132

#46. 'diabetes self management profile*':ti,ab,kw,ok 65

#45. #5 AND #11 AND #44 1,234

#44. #19 OR #20 OR #21 OR #22 OR #23 OR #24 OR #25 OR 134,748

#26 OR #27 OR #28 OR #29 OR #30 OR #31 OR #32 OR

#33 OR #34 OR #35 OR #36 OR #37 OR #38 OR #39 OR

#40 OR #41 OR #42 OR #43

#43. dbr:ti,ab,kw,ok 415

#42. rcr:ti,ab,kw,ok 2,270

#41. mra:ti,ab,kw,ok 14,366

#40. pds:ti,ab,kw,ok 9,459

#39. 'proportion of days covered':ti,ab,kw,ok 2,070

#38. mat:ti,ab,kw,ok 11,995

#37. mcq:ti,ab,kw,ok 1,353

#36. mars*:ti,ab,kw,ok 35,816

#35. seams*:ti,ab,kw,ok 1,043

#34. 'self-efficacy':ti,ab,kw,ok AND 'appropriate 38

medication':ti,ab,kw,ok

#33. maq:ti,ab,kw,ok 318

#32. mmas*:ti,ab,kw,ok 1,745

#31. 'morisky medication adherence scale'/de OR 2,799

morisky*:ti,ab,kw,ok

#30. hbcs*:ti,ab,kw,ok 390

#29. 'hill-bone*':ti,ab,kw,ok 75

#28. bmq:ti,ab,kw,ok 578

#27. 'brief medication questionnaire*':ti,ab,kw,ok 84

#26. 'pill count*':ti,ab,kw,ok OR 1,581

pillcount*:ti,ab,kw,ok

#25. cma:ti,ab,kw,ok OR cmg:ti,ab,kw,ok OR 40,317

csa:ti,ab,kw,ok OR csg:ti,ab,kw,ok

#24. 'medication gap*':ti,ab,kw,ok 130

#23. 'medication acquisition*':ti,ab,kw,ok 122

#22. 'interval measure':ti,ab,kw,ok AND 19

medication*:ti,ab,kw,ok

#21. 'dichotomous variable*':ti,ab,kw,ok 2,859

#20. mpr:ti,ab,kw,ok OR mprs:ti,ab,kw,ok 6,310

#19. 'medication possession ratio*':ti,ab,kw,ok 2,679

#18. #5 AND #11 AND #17 17,879

#17. #12 OR #13 OR #14 OR #15 OR #16 1,377,610

#16. discontinu*:ti,ab,kw,ok 206,840

#15. complian*:ti,ab,kw,ok OR noncomplian*:ti,ab,kw,ok 240,044

OR comply:ti,ab,kw,ok OR noncomply:ti,ab,kw,ok OR

complies:ti,ab,kw,ok OR noncomplies:ti,ab,kw,ok

OR complied:ti,ab,kw,ok OR

noncomplied:ti,ab,kw,ok OR complier*:ti,ab,kw,ok

OR noncomplier*:ti,ab,kw,ok OR

complying:ti,ab,kw,ok OR noncomplying:ti,ab,kw,ok

#14. persist*:ti,ab,kw,ok OR nonpersist*:ti,ab,kw,ok 646,320

#13. adher*:ti,ab,kw,ok OR nonadher*:ti,ab,kw,ok 286,305

#12. 'patient compliance'/exp 158,868

#11. #6 OR #7 OR #8 OR #9 OR #10 2,015,184

#10. bmi:ti,ab,kw,ok OR bmis:ti,ab,kw,ok OR 'body 490,011

mass':ti,ab,kw,ok

#9. 'body mass'/de 443,983

#8. weigh*:ti,ab,kw,ok 1,422,994

#7. 'body weight gain'/exp OR 'body weight loss'/de 279,382

OR 'weight gain'/de OR 'weight reduction'/de

#6. 'body weight'/de OR 'body weight change'/de OR 335,764

'body weight fluctuation'/de OR 'body weight

variation'/de OR 'weight trajectory (body

weight)'/de OR 'body weight control'/de

#5. #1 OR #2 OR #3 OR #4 1,176,747

#4. niddm:ti,ab,kw,ok OR 'nid-dm':ti,ab,kw,ok OR 9,010

iidm:ti,ab,kw,ok OR 'ii-dm':ti,ab,kw,ok

#3. dm2:ti,ab,kw,ok OR t2dm:ti,ab,kw,ok OR 61,178

t2d:ti,ab,kw,ok OR 't2-d':ti,ab,kw,ok

#2. diabet*:ti,ab,kw,ok OR dm:ti,ab,kw,ok 1,012,025

#1. 'diabetes mellitus'/de OR 'non insulin dependent 795,154

diabetes mellitus'/de

**Table S3** Listing of adherence/discontinuation measures or questionnaires included in search

- Brief Medication Questionnaire (BMC)
- Compliance ratio
- Continuous, Multiple Interval Measure of Medication Acquisition (CMA)
- Continuous, Multiple Interval Measure of Medication Gaps (CMG)
- Continuous, Single Interval Measure of Medication Acquisition (CSA)
- Continuous, Single Interval Measure of Medication Gaps (CSG)
- Days between fills adherence rates (DBR)
- Diabetes Self-Management Profile (DSMP)
- Diabetes Self-Management Questionnaire (DSMQ)
- Eight-Item Morisky Medication Adherence Scale (MMAS-8)
- Hill-Bone Compliance Scale (Hill-Bone)
- Measurement of Adherence to Treatments (MAT)
- Measurement of Adherence to Treatments (MAT)
- Medication Adherence Questionnaire (MAQ) – also known as the 4-item Morisky Medication Adherence Scale (MMAS-4) and Morisky Scale
- Medication Adherence Report Scale (MARS)
- Medication Compliance Questionnaire (MCQ)
- Medication Possession Ratio (MPR) (including MPR-modified)
- Medication refill adherence (MRA)
- Pill count
- Proportion of days covered (PDS)
- Refill compliance rate (RCR)
- The Self-Efficacy for Appropriate Medication Use Scale (SEAMS)
- The Summary of Diabetes Self-Care Activities (SDSCA)
- The Summary of Diabetes Self-Care Activities (SDSCA)

**Table S4**  Baseline demographics from included studies

|  | **Male, %** | **Age, years** | **Mean HbA1c, %** | **Mean BMI, kg/m**2 | **Baseline treatment breakdown, %** |
| --- | --- | --- | --- | --- | --- |
| **Bell et al, 2014 [1]** | 47.8 | 59.6 | - Weight loss cohort = 8.0 - Weight-neutral cohort = 7.7 | - BMI data not reported, but weight data were provided - The weight-loss cohort weighed more than the weight-neutral cohort in the pre-index period (101 vs 97 kg p<0.001) | NR |
| **Carls et al, 2017 [2]** | - GLP-1 RA = 47 - DPP-4i = 54 - SU = 55 | - GLP-1 RA = 56 - DPP-4i = 62 - SU = 63 | - GLP-1 RA = 8.2 - DPP-4i = 8.0 - SU = 8.0 | - GLP-1 RA = 38 - DPP-4i = 34 - SU = 34 | - GLP-1 RA   None = 9  MET = 15  Advanced T2D medicationa =76   - DPP-4i   None = 15  MET = 24  Advanced T2D medication = 61   - SU   None = 31  MET = 41  Advanced T2D medication = 28 |
| **Durden et al, 2019 [3]** | Response: body weight   - No early effect = 47.1 - Dropped >3% = 42.6 | Response: body weight   - No early effect = 57.0 - Dropped >3% = 57.7 | Response: body weight   - No early effect = 8.4 - Dropped >3% = 8.3 | - BMI data not reported, but weight data were provided - The no early effect cohort had a mean weight of 109.2 kg and the dropped >3% cohort had a mean weight of 108.6 kg. There was no significant difference between groups | - No early effect   Albiglutide = 1.7  Dulaglutide = 1.9  Exenatide BID = 16.6  Exenatide QW = 18.4  Liraglutide = 61.3   - Dropped > 3%   Albiglutide = 1.1  Dulaglutide = 1.3  Exenatide = 14.7  Exenatide QW = 16.4  Liraglutide = 66.4 |
| **Gordon et al, 2018 [4]** | - OAD monotherapy = 60.0 - OAD dual therapy = 65.1 - OAD triple therapy = 69.9 | - OAD monotherapy= 59.2 - OAD dual therapy = 56.9 - OAD triple therapy = 56.6 | - OAD monotherapy = 7.8 - OAD dual therapy = 8.6 - OAD triple therapy = 9.1 | - OAD monotherapy = 32.9 - OAD dual therapy = 32.8 - OAD triple therapy = 33.4 | - OAD monotherapy   MET = 90.4  SU = 7.3  DPP-4i = 1.8  Other = 0.5   - OAD dual therapy   MET + SU = 57.9  MET + DPP-4i = 29.1  MET + TZD = 5.5  MET + SGLT-2i = 2.8  SU + DPP-4i = 2.7  Other = 2.0   - OAD triple therapy   MET + SU + DDP-4i= 64.9  MET + SU + TZD = 13.8  MET + DPP-4i + SGLT-2i = 7.8  MET + DPP-4i + TZD = 6.9  MET + SU + SGLT-2i = 4.5  Other = 2.1 |
| **Grandy et al, 2013 [5]** | - >1.0% weight loss = 37.7 - ≥3.0% weight loss = 35.4 - ≥5.0% weight loss = 33.5 - >1.0% weight gain = 38.2 | - >1.0% weight loss = 64.7 - ≥3.0% weight loss = 64.8 - ≥5.0% weight loss = 63.6 - >1.0% weight gain = 62.1 | NR | - >1.0% weight loss = 33.2 - ≥3.0% weight loss = 33.1 - ≥5.0% weight loss = 33.2 - >1.0% weight gain = 35.6 | - >1.0% weight loss   TZD, insulin, and/or SU = 72.5  GLP-1 RA and/or MET = 27.5   - ≥3.0% weight loss:   TZD, insulin, and/or SU = 73.8  GLP-1 RA and/or MET = 26.2   - ≥5.0% weight loss:   TZD, insulin, and/or SU = 75.9  GLP-1 RA and/or MET = 24.1   - >1.0% weight gain:   TZD, insulin, and/or SU = 80.9  GLP-1 RA and/or MET = 19.1 |
| **McAdam-Marx et al, 2014 [6]** | 49.1 | 59.1 | 8.6 | 35.8 | - MET/GLP-1 RA = 35.6 - SU/TZD/DPP-4i/insulin/other = 64.4 |
| **McAdam-Marx et al, 2014 [7]** | 44 | 61.1 | 8.10 | 35.3 | - MET/GLP-1 RA = 34.9 - SU/TZD/DPP-4i/insulin/other = 65.1 - Number of prior antidiabetes drug classes used   0 = 30.7  1 = 24.1  2 = 21.1  3 = 16.9  >4 = 7.2 |
| **Melzer-Cohen et al, 2019 [8]** | - Prematching:   Continuers = 52.8  Discontinuers = 54.9   - Postmatching:   Continuers = 56.3  Discontinuers = 55.1 | - Prematching:   Continuers = 60.1  Discontinuers = 60.3   - Postmatching:   Continuers = 60.2  Discontinuers = 60.3 | - Prematching:   Continuers = 8.9%  Discontinuers = 8.9%   - Postmatching:   Continuers = 9.0%  Discontinuers = 9.0% | - Prematching:   Continuers = 34.9  Discontinuers = 34.2   - Postmatching:   Continuers = 34.3  Discontinuers = 34.2 | MET:   - Prematching:   Continuers = 91.3  Discontinuers = 86.3   - Postmatching:   Continuers = 90.4  Discontinuers = 86.4  SU:   - Prematching:   Continuers = 43.5  Discontinuers = 39.1   - Postmatching:   Continuers = 39.2  Discontinuers = 39.2  DPP-4i:   - Prematching:   Continuers = 56.5  Discontinuers = 51.9   - Postmatching:   Continuers = 53.7  Discontinuers = 51.9  Insulin:   - Prematching:   Continuers = 46.3  Discontinuers = 55.1   - Postmatching:   Continuers = 55.6  Discontinuers = 55.3  TZDs:   - Prematching:   Continuers – 2.2  Discontinuers – 2.6   - Postmatching:   Continuers – 1.9  Discontinuers – 2.6  Acarbose:   - Prematching:   Continuers – 4.0  Discontinuers – 2.6   - Postmatching:   Continuers – 3.2  Discontinuers – 2.6  Meglitinides:   - Prematching:   Continuers – 17.0  Discontinuers – 16.8   - Postmatching:   Continuers – 17.1  Discontinuers – 16.9 |
| **Patel et al, 2019 [9]** | 29 | 47 | 12.10 | NR | - NR (although notes that 76% were already being treated with insulin prior to the study) |

aAny prescription fill for diabetes medication other than metformin monotherapy during the baseline year, including other antidiabetic monotherapies or combinations.

BID, twice daily; BMI, body mass index; DPP-4[i], dipeptidyl peptidase 4 [inhibitor]; GLP-1 RA, glucagon-like peptide-1 receptor agonist; HbA1c, glycated hemoglobin; MET, metformin; NR, not reported; OAD, oral antidiabetes drug; QW, weekly; SGLT-2[i], sodium/glucose cotransporter 2 [inhibitor]; SU, sulfonylurea; T2D, type 2 diabetes; TZD, thiazolidinedione.

# References

1. Bell K, Parasuraman S, Shah M, et al. Economic implications of weight change in patients with type 2 diabetes mellitus. Am J Manag Care. 2014;20(8):e320–9.
2. Carls GS, Tan R, Zhu JY, et al. Real-world weight change among patients treated with glucagon-like peptide-1 receptor agonist, dipeptidyl peptidase-4 inhibitor and sulfonylureas for type 2 diabetes and the influence of medication adherence. Obes Sci Pract. 2017;3(3):342–51.
3. Durden E, Liang M, Fowler R, Panton UH, Mocevic E. The effect of early response to GLP-1 RA therapy on long-term adherence and persistence among type 2 diabetes patients in the United States. J Manag Care Spec Pharm. 2019;25(6):669–80.
4. Gordon J, McEwan P, Idris I, et al. Treatment choice, medication adherence and glycemic efficacy in people with type 2 diabetes: a UK clinical practice database study. BMJ Open Diabetes Res Care. 2018;6(1):e000512.
5. Grandy S, Fox KM, Hardy E. Association of weight loss and medication adherence among adults with type 2 diabetes mellitus: SHIELD (Study to Help Improve Early evaluation and management of risk factors Leading to Diabetes). Curr Ther Res Clin Exp. 2013;75:77–82.
6. McAdam-Marx C, Bellows BK, Unni S, et al. Determinants of glycaemic control in a practice setting: the role of weight loss and treatment adherence (the DELTA Study). Int J Clin Pract. 2014;68(11):1309–17.
7. McAdam-Marx C, Bellows BK, Unni S, et al. Impact of adherence and weight loss on glycemic control in patients with type 2 diabetes: Cohort analyses of integrated medical record, pharmacy claims, and patient-reported data. J Manag Care Spec Pharm. 2014;20(7):691–700.
8. Melzer-Cohen C, Chodick G, Husemoen LLN, et al. A retrospective database study of liraglutide persistence associated with glycemic and body weight control in patients with type 2 diabetes. Diabetes Ther. 2019;10(2):683–96.
9. Patel S, Abreu M, Tumyan A, et al. Effect of medication adherence on clinical outcomes in type 2 diabetes: analysis of the SIMPLE study. BMJ Open Diabetes Res Care. 2019;7(1):e000761.
